# Supplementary material for: Depletion of LAG‐3+ T Cells Translated to Pharmacology and Improvement in Psoriasis Disease Activity: A Phase I Randomized Study of mAb GSK2831781
Source: PubMed Central journal article supplement — Clin Pharmacol Ther. 2020 Nov 24;109(5):1293–303. doi: 10.1002/cpt.2091 (PMC8246744; doi:10.1002/cpt.2091), 2020-11-24
Supplement: CPT-109-1293-s004.pdf [file CPT-109-1293-s004.pdf]

**Supplementary Figure 1. CONSORT flow diagram of study participants.**

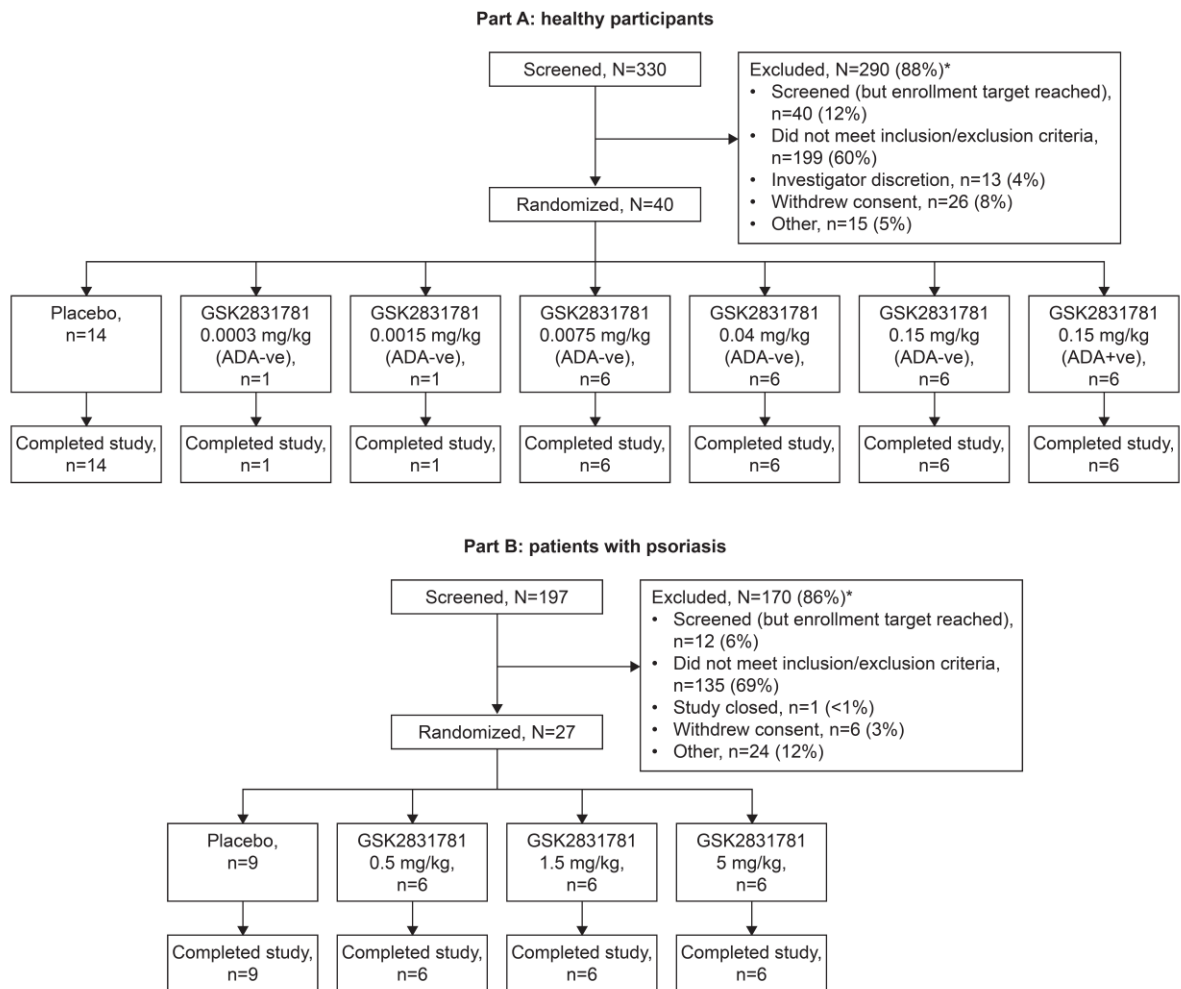

\*Patients could be excluded for multiple reasons of screen failure, therefore counts of reasons sum to more than total excluded.

ADA, anti-drug antibodies; N, number of participants/patients.
