# Supplementary material for: Depletion of LAG‐3+ T Cells Translated to Pharmacology and Improvement in Psoriasis Disease Activity: A Phase I Randomized Study of mAb GSK2831781
Source: PubMed Central journal article supplement — Clin Pharmacol Ther. 2020 Nov 24;109(5):1293–303. doi: 10.1002/cpt.2091 (PMC8246744; doi:10.1002/cpt.2091), 2020-11-24
Supplement: CPT-109-1293-s010.pdf [file CPT-109-1293-s010.pdf]

### Supplementary Figure 3

**Summary of epigenetic analyses. (A)** Heat map for observed changes in gene expression in patients with psoriasis. **(B)** Observed mean ( $\pm$ SE) epigenetic cell count at day 29 in psoriasis lesional biopsies (% of cells)

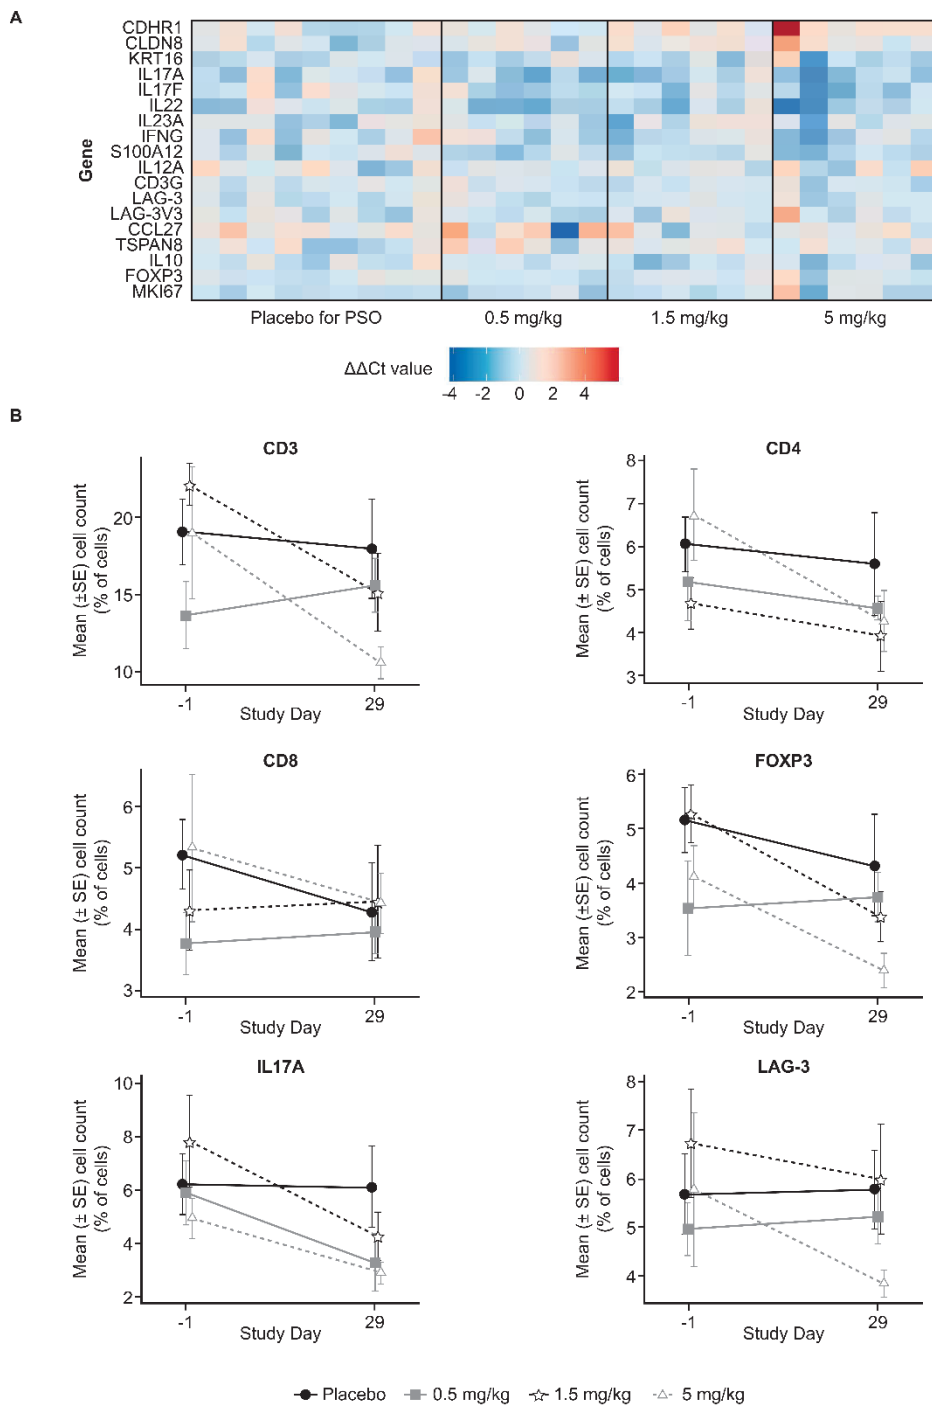

IL, interleukin; PSO, psoriasis; SE, standard error.
